# Supplementary material for: Multifactorial Intervention and Cardiovascular Disease in Patients with Type 2 Diabetes
Source: Atypon-hosted journal article supplement (doi:10.1056/nejmoa021778), 2003-01-29
Supplement: nejm_gaede_383sa1.pdf [file nejm_gaede_383sa1.pdf]

# Supplementary Appendix

This appendix has been provided by the authors to give readers additional information about their work.

Supplement to: Gaede P, Vedel P, Larsen N, et al. Multifactorial Intervention and Cardiovascular Disease in Patients with Type 2 Diabetes. *N Engl J Med* 2003;348:383-93.

**Supplementary Appendix. Base-Line Characteristics of the Patients.\***

| Characteristic                                   | Conventional Therapy<br>(N=80) | Intensive Therapy<br>(N=80) |
|--------------------------------------------------|--------------------------------|-----------------------------|
| <b>Demographic</b>                               |                                |                             |
| Sex                                              |                                |                             |
| Male                                             | 56                             | 63                          |
| Female                                           | 24                             | 17                          |
| Age (yr)                                         | 55.2±7.2                       | 54.9±7.2                    |
| <b>Clinical</b>                                  |                                |                             |
| Body-mass index                                  |                                |                             |
| Men                                              | 30.3±5.3                       | 29.3±3.6                    |
| Women                                            | 28.9±3.8                       | 31.1±4.5                    |
| Waist circumference (cm)                         |                                |                             |
| Men                                              | 107±14                         | 105±10                      |
| Women                                            | 101±13                         | 100±14                      |
| Hip circumference (cm)                           |                                |                             |
| Men                                              | 106±13                         | 106±10                      |
| Women                                            | 108±11                         | 112±9                       |
| Systolic blood pressure (mm Hg)                  | 149±19                         | 146±20                      |
| Diastolic blood pressure (mm Hg)                 | 86±11                          | 85±10                       |
| Smoking status (no. of patients)                 |                                |                             |
| Never smoked                                     | 20                             | 21                          |
| Former smoker                                    | 33                             | 27                          |
| Current smoker                                   | 27                             | 32                          |
| Duration of diabetes (yr)                        |                                |                             |
| Median                                           | 6.0                            | 5.5                         |
| Range                                            | 4.0–10.0                       | 2.0–8.8                     |
| Retinopathy (no. of patients)                    |                                |                             |
| Nonproliferative                                 | 18                             | 16                          |
| Proliferative or photocoagulated                 | 3                              | 6                           |
| Neuropathy (no. of patients)                     |                                |                             |
| Autonomic                                        | 20                             | 24                          |
| Peripheral                                       | 29                             | 26                          |
| Known cardiovascular disorders (no. of patients) |                                |                             |
| Electrocardiographic evidence of ischemia        | 21                             | 18                          |
| Myocardial infarction                            | 2                              | 6                           |
| Coronary-artery bypass graft                     | 2                              | 0                           |
| Stroke                                           | 3                              | 2                           |
| Angina or intermittent claudication              | 13                             | 13                          |
| Arterial surgery on legs                         | 2                              | 1                           |
| Amputation owing to ischemia                     | 0                              | 0                           |

| <b>Supplementary Appendix. (Continued.)</b>              |                                        |                                     |
|----------------------------------------------------------|----------------------------------------|-------------------------------------|
| <b>Characteristic</b>                                    | <b>Conventional Therapy<br/>(N=80)</b> | <b>Intensive Therapy<br/>(N=80)</b> |
| <b>Daily dietary intake</b>                              |                                        |                                     |
| Energy intake (kcal)                                     |                                        |                                     |
| Median                                                   | 2138                                   | 2258                                |
| Range                                                    | 1351–6065                              | 1391–3366                           |
| Protein (% of energy intake)                             | 15.6±2.0                               | 15.4±2.5                            |
| Carbohydrates (% of energy intake)                       | 38.6±6.1                               | 37.2±6.3                            |
| Alcohol (% of energy intake)                             | 4.0±6.6                                | 6.3±9.2                             |
| Fat (% of energy intake)                                 | 41.8±6.5                               | 41.1±6.4                            |
| Saturated fatty acids (% of energy intake)               | 17.4±4.0                               | 17.5±3.4                            |
| <b>Exercise (min/wk)</b>                                 |                                        |                                     |
| Median                                                   | 105                                    | 120                                 |
| Range                                                    | 0–900                                  | 0–725                               |
| <b>Biochemical</b>                                       |                                        |                                     |
| Fasting plasma glucose (mg/dl)                           | 189±54                                 | 182±56                              |
| Glycosylated hemoglobin (%)                              | 8.8±1.7                                | 8.4±1.6                             |
| Fasting serum C peptide (pmol/liter)                     |                                        |                                     |
| Median                                                   | 863                                    | 846                                 |
| Range                                                    | 300–1686                               | 294–1655                            |
| Stimulated serum C peptide (pmol/liter)                  |                                        |                                     |
| Median                                                   | 1514                                   | 1438                                |
| Range                                                    | 644–3170                               | 680–3315                            |
| Fasting serum triglycerides (mg/dl)                      | 270±280                                | 195±126                             |
| Fasting serum total cholesterol (mg/dl)                  | 223±50                                 | 210±41                              |
| Fasting serum LDL cholesterol (mg/dl)                    | 137±37                                 | 133±36                              |
| Fasting serum HDL cholesterol (mg/dl)                    | 39±11                                  | 40±9                                |
| Serum creatinine (mmol/liter)                            | 76±16                                  | 78±17                               |
| Urinary albumin excretion rate (mg/24 hr)                |                                        |                                     |
| Median                                                   | 69                                     | 78                                  |
| Range                                                    | 32–286                                 | 32–265                              |
| Urinary sodium excretion rate (mmol/24 hr)               |                                        |                                     |
| Median                                                   | 211                                    | 185                                 |
| Range                                                    | 46–577                                 | 25–513                              |
| Glomerular filtration rate (ml/min/1.73 m <sup>2</sup> ) | 118±25                                 | 116±24                              |

\* Plus–minus values are means ±SD. To convert values for energy intake to kilojoules, multiply by 4.184. To convert values for glucose to millimoles per liter, multiply by 0.05556. To convert values for triglycerides to millimoles per liter, multiply by 0.01129. To convert values for cholesterol to millimoles per liter, multiply by 0.02586. LDL denotes low-density lipoprotein, and HDL high-density lipoprotein.
